# Supplementary material
Source: MDPI journal article supplement (https://www.mdpi.com/2312-7481/6/4/58)
Supplement: s1 [file s1]

Electronic Supplementary Information for:

**Ligand Control of  $^{59}\text{Co}$  Nuclear-Spin Relaxation  
Thermometry**

Tyler M. Ozvat, Spencer H. Johnson, Anthony K. Rappé, Joseph M. Zadrozny  
Department of Chemistry, Colorado State University, 1301 Center Ave., Fort Collins,  
CO, 80523-1872

### Table of Contents

|                                                                                                             |     |
|-------------------------------------------------------------------------------------------------------------|-----|
| <b>General Considerations</b>                                                                               | S03 |
| <b>Relaxation Fits and Linewidth Analysis</b>                                                               | S03 |
| <b>Structure and Correlation Time Predictions</b>                                                           | S03 |
| <b>Table S1</b> Variable temperature $^{59}\text{Co}$ $T_2^*$ values and linewidth fit values               | S05 |
| <b>Table S2</b> Linear trend fit parameters for $\ln(T_1)$ vs $1/T$ ( $10^3 \text{ K}^{-1}$ ) of <b>1-6</b> | S05 |
| <b>Table S3</b> Calculated variable-temperature correlation times of <b>2-6</b>                             | S06 |
| <b>Figure S1</b> Variable temperature inversion recovery fits of <b>1</b>                                   | S06 |
| <b>Figure S2</b> Variable temperature inversion recovery fits of <b>2</b>                                   | S07 |
| <b>Figure S3</b> Variable temperature inversion recovery fits of <b>3</b>                                   | S07 |
| <b>Figure S4</b> Variable temperature inversion recovery fits of <b>4</b>                                   | S08 |
| <b>Figure S5</b> Variable temperature inversion recovery fits of <b>5</b>                                   | S08 |
| <b>Figure S6</b> Variable temperature inversion recovery fits of <b>6</b>                                   | S09 |
| <b>Figure S7</b> $T_1$ trend analysis $\ln(T_1)$ vs. $T$ ( $^{\circ}\text{C}$ ) of <b>1-6</b>               | S09 |
| <b>Figure S8</b> Variable temperature CPMG fits of <b>4</b> from 30-60 $^{\circ}\text{C}$                   | S10 |
| <b>Figure S9</b> Variable temperature CPMG fits of <b>1</b> from 10-60 $^{\circ}\text{C}$                   | S10 |
| <b>Figure S10</b> Variable temperature CPMG fits of <b>2</b> from 10-60 $^{\circ}\text{C}$                  | S11 |
| <b>Figure S11</b> Variable temperature CPMG fits of <b>3</b> from 10-60 $^{\circ}\text{C}$                  | S11 |
| <b>Figure S12</b> Variable temperature correlation times of <b>2-6</b>                                      | S12 |
| <b>Table S4</b> Computed structure of <b>3</b> at 13 $^{\circ}\text{C}$                                     | S12 |
| <b>Table S5</b> Computed structure of <b>3</b> at 35 $^{\circ}\text{C}$                                     | S13 |
| <b>Table S6</b> Computed structure of <b>3</b> at 57 $^{\circ}\text{C}$                                     | S14 |
| <b>Table S7</b> Computed structure of <b>4</b> at 13 $^{\circ}\text{C}$                                     | S15 |
| <b>Table S8</b> Computed structure of <b>4</b> at 35 $^{\circ}\text{C}$                                     | S16 |
| <b>Table S9</b> Computed structure of <b>4</b> at 57 $^{\circ}\text{C}$                                     | S18 |
| <b>Table S10</b> Computed structure of <b>5</b> at 13 $^{\circ}\text{C}$                                    | S19 |
| <b>Table S11</b> Computed structure of <b>5</b> at 35 $^{\circ}\text{C}$                                    | S20 |
| <b>Table S12</b> Computed structure of <b>5</b> at 57 $^{\circ}\text{C}$                                    | S21 |
| <b>Table S13</b> Computed structure of <b>6</b> at 13 $^{\circ}\text{C}$                                    | S23 |
| <b>Table S14</b> Computed structure of <b>6</b> at 35 $^{\circ}\text{C}$                                    | S24 |
| <b>Table S15</b> Computed structure of <b>6</b> at 57 $^{\circ}\text{C}$                                    | S26 |
| <b>References</b>                                                                                           | S28 |

## General Considerations

Studied compounds in this manuscript were either purchased from commercial chemical vendors or synthesized according previously reported literature preparations. Those compounds purchased were potassium hexacyanocobaltate(III) ( $K_3[Co(CN)_6]$ , **1**) and hexamminecobalt(III) chloride ( $[Co(NH_3)_6]Cl_3$ , **2**) and used in sample preparations as received. Compounds of study **3–6** were synthesized and are reported in previous work [1–5]. Characterization of **1–6** is detailed previously by us [6] where NMR spectra were collected on an Agilent Unity INOVA 500 MHz ( $^1H$ ) spectrometer. UV-Vis spectra were collected on aqueous solutions of with an Agilent 8453 UV-Visible spectrophotometer. IR spectra were collected on solid powders with a Bruker TENSOR II FTIR spectrometer. Combustion analyses were performed by Robertson Microлит Laboratories.

## Relaxation Fits and Linewidth Analysis

Fitting of all inversion recovery and CPMG experimental relaxation data was completed in Origin. A three-parameter exponential function (Eq. 1) was used to fit both sets of relaxation arrays in order to extract pertinent  $T_1$  and  $T_2$  relaxation values.

$$y = Ae^{\left(\frac{-x}{t_1}\right)} + y_0 \quad \text{Eq. 1}$$

Where  $t_1$  was solved for and taken directly as the experimental spin-lattice relaxation time,  $T_1$  (s) from inversion recovery relaxation arrays (Figures S1-S6), and spin-spin relaxation time,  $T_2$  (s) from CPMG experiments (Figures S8-S11). Values of  $T_2^*$  were extracted the inverse relation of  $T_2^*$  to the full-width half-maximum (FWHM) of 1D  $^{59}Co$ -NMR spectra (Eq. 2).

$$T_2^* = 1/(2\pi\Delta\nu) \quad \text{Eq. 2}$$

Where  $\Delta\nu$  (Hz) is the width of the FWHM extracted using a custom script written in MATLAB based on the findpeaks() method found in MATLAB's Signal Processing Toolbox [. All peak locations and widths were verified graphically before being used to calculate  $T_2^*$  [7]. The specific script utilized herein is available upon reasonable request.

## Structure and Correlation Time Predictions

Optimized molecular structures were computed for **3–6** using Gaussian 16 electronic software package [8]. Each optimization utilized the  $\omega B97XD$  [9,10] functional and 6-311+g\* basis set [11]. For each complex, three separate optimizations were performed with fixed metal-ligand bond lengths corresponding to previously determined experimental temperature-specific structures at 13, 35, and 57 °C by extended X-ray absorption fine structure (EXAFS). While the Co–N primary coordination sphere was restricted to experimental values, the remainder of the ligand structure was allowed to

minimize freely. The electronic properties of these experimentally-assisted predictions were then performed using ORCA 4.11 electronic software package [12] to determine values of the electric quadrupolar coupling constant ( $e^2qQ$ ). Values of  $e^2qQ$  for each temperature-specific structure are compiled in **Figure 4b on manuscript**.

$$\frac{1}{T_1^Q} = \frac{3(2I + 3)}{400I^2(2I - 1)} \left( \frac{e^2Qq}{\hbar} \right)^2 \left( 1 + \frac{\eta^2}{3} \right) \left( \frac{2}{1 + \omega_x^2 \tau_c^2} + \frac{8}{1 + 4\omega_x^2 \tau_c^2} \right) \tau_c \quad \text{Eq. 3}$$

In addition to  $e^2qQ$ , the asymmetry parameter,  $\eta$  was predicted from each temperature-specific structure. Together, these values were used to determine correlation times,  $\tau_c$  from the canonical equation for  $T_1$  (Eq. 3) [13,14]. The asymmetry parameters and quadrupole coupling constant vary for each complex and temperature. From these computational values, an equation of a single distinct coefficient was generated for each compound. The coefficients were plotted against the experimental temperatures and fit using a second-degree polynomial under the assumption that the coefficients varied continuously across the temperature range of 10-60°C. Each compound thus has a second degree polynomial as a function of temperature which outputs a single coefficient which is then used to generate coefficients for each temperature (10, 20, 30, 40, 50, and 60°C). Finally, the equation of  $T_1$  as a function of rotational correlation time was solved by inserting the experimentally derived  $T_1$  spin-lattice relaxation times and solving for  $\tau_c$ . This process was accomplished via custom MATLAB script with the assistance of the curve-fitting and symbolic mathematics toolboxes [15,16]. All code used herein is available upon reasonable request.

**Table S1.** Temperature-specific  $T_2^*$  dephasing times for **1-6** from 10-60 °C. Values were determined from full-width half-max (FWHM) linewidth analysis of 1D  $^{59}\text{Co}$  NMR spectra.

| T (°C) | $T_2^*$ (ms) |      |      |      | $T_2^*$ (μs) |     |
|--------|--------------|------|------|------|--------------|-----|
|        | 1            | 2    | 3    | 4    | 5            | 6   |
| 10     | 6.00         | 2.16 | 2.93 | 1.41 | 240          | 170 |
| 20     | 9.76         | 2.02 | 3.21 | 1.77 | 312          | 242 |
| 30     | 10.57        | 1.83 | 3.07 | 1.93 | 387          | 320 |
| 40     | 7.58         | 1.70 | 2.61 | 1.98 | 471          | 405 |
| 50     | 5.53         | 1.57 | 2.25 | 1.83 | 560          | 492 |
| 60     | 3.73         | 1.43 | 1.87 | 1.65 | 626          | 566 |

**Table S2.** Arrhenius analysis of **1-6**. Linearity is determined from evaluations of  $R^2$  values with error in slope and intercept values. Activation energy,  $E_a$  (kJ/mol) is calculated from the slope of  $\ln(T_1)$  vs  $1/T$  ( $10^3 \text{ K}^{-1}$ ) plots (see manuscript **Figure 5**).

|                | 1       | 2        | 3        | 4       | 5        | 6        |
|----------------|---------|----------|----------|---------|----------|----------|
| $R^2$          | 0.9138  | 0.9131   | 0.9953   | 0.9988  | 0.9964   | 0.9997   |
| Slope          | -0.7(1) | -0.66(9) | -1.98(6) | -2.4(4) | -2.12(6) | -1.79(1) |
| Intercept      | 2.3(2)  | 2.0(3)   | 6.0(2)   | 7.5(1)  | 6.4(2)   | 5.37(5)  |
| $E_a$ (kJ/mol) | 6.2(8)  | 5.5(8)   | 16.4(5)  | 20.6(3) | 17.6(5)  | 14.9(1)  |

**Table S3.** Calculated correlation times of **2-6** from 10-60 °C. Values of correlation times,  $\tau_c$  are determined using Eq. 3 detailed above.

| T (°C) | $\tau_c$ ( $10^{-12}$ s) |       |        |        |        |
|--------|--------------------------|-------|--------|--------|--------|
|        | 2                        | 3     | 4      | 5      | 6      |
| 10     | 17.35                    | 68.37 | 1150   | 153.25 | 190.31 |
| 20     | 14.63                    | 52.34 | 891.31 | 115.58 | 152.26 |
| 30     | 13.19                    | 42.03 | 722.32 | 88.69  | 124.83 |
| 40     | 12.15                    | 34.35 | 610.67 | 72.49  | 103.29 |
| 50     | 11.57                    | 28.87 | 526.34 | 60.2   | 87.53  |
| 60     | 11.32                    | 25.21 | 488.02 | 49.47  | 74.61  |

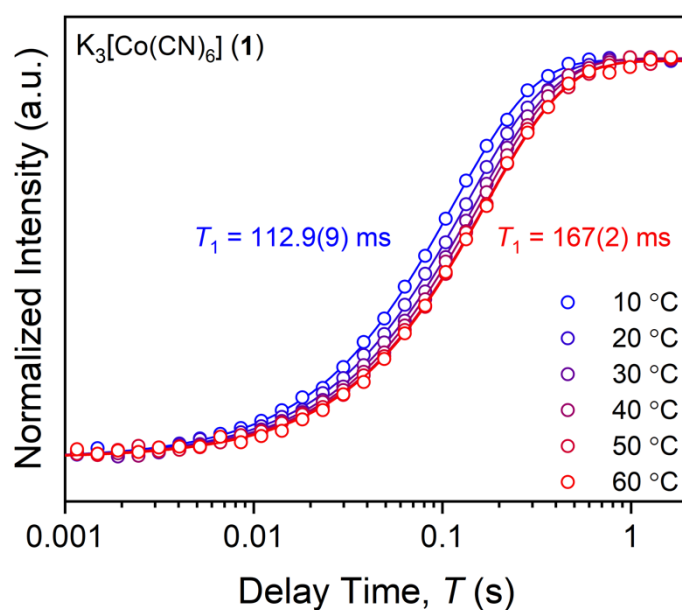

**Figure S1.** Variable temperature inversion recovery of complex **1** over a 10-60 °C temperature range at 30 mM concentration. Inversion recovery data (circles) are fit to relaxation curves (lines) to parameterize  $T_1$  over a range of 112.9(9) to 167(2) ms with temperature.

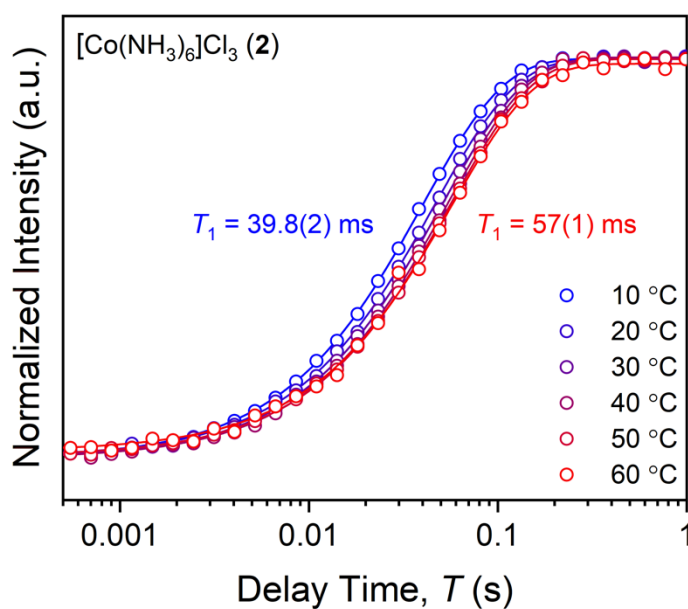

**Figure S2.** Variable temperature inversion recovery of complex **2** over a 10-60 °C temperature range at 30 mM concentration. Inversion recovery data (circles) are fit to relaxation curves (lines) to parameterize  $T_1$  over a range of 39.8(2) to 57(1) ms with temperature.

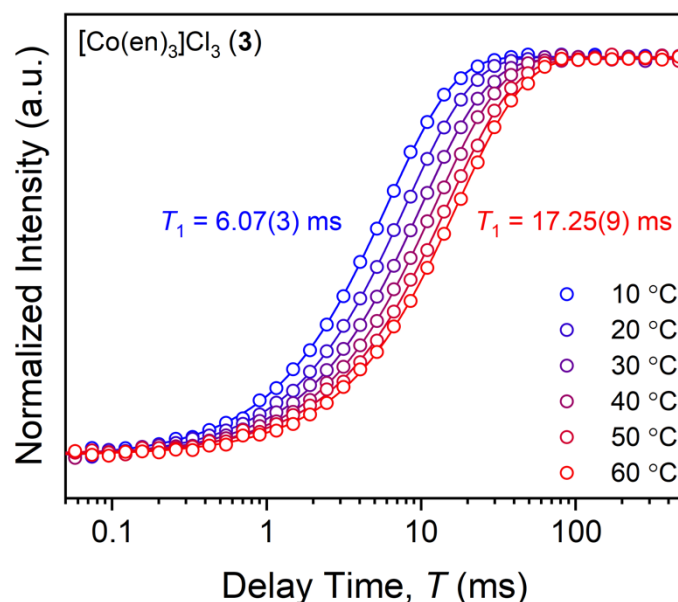

**Figure S3.** Variable temperature inversion recovery of complex **3** over a 10-60 °C temperature range at 30 mM concentration. Inversion recovery data (circles) are fit to relaxation curves (lines) to parameterize  $T_1$  over a range of 6.07(3) to 17.25(9) ms with temperature.

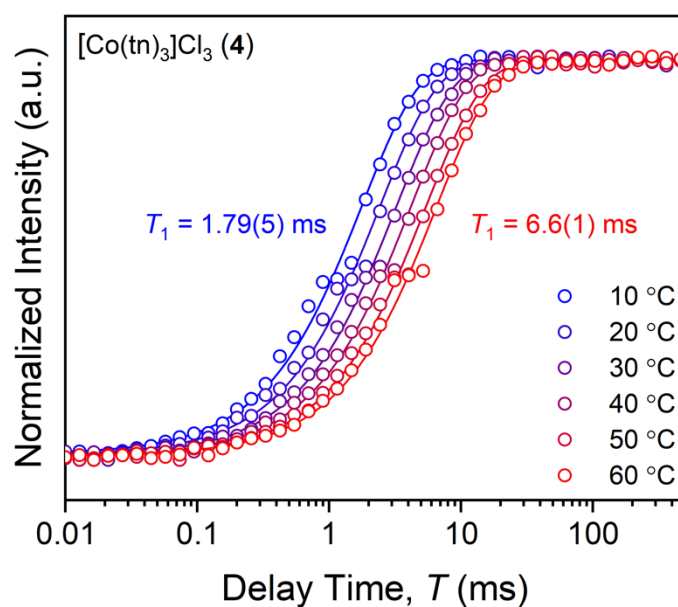

**Figure S4.** Variable temperature inversion recovery of complex **4** over a 10-60 °C temperature range at 30 mM concentration. Inversion recovery data (circles) are fit to relaxation curves (lines) to parameterize  $T_1$  over a range of 1.79(5) to 6.6(1) ms with temperature.

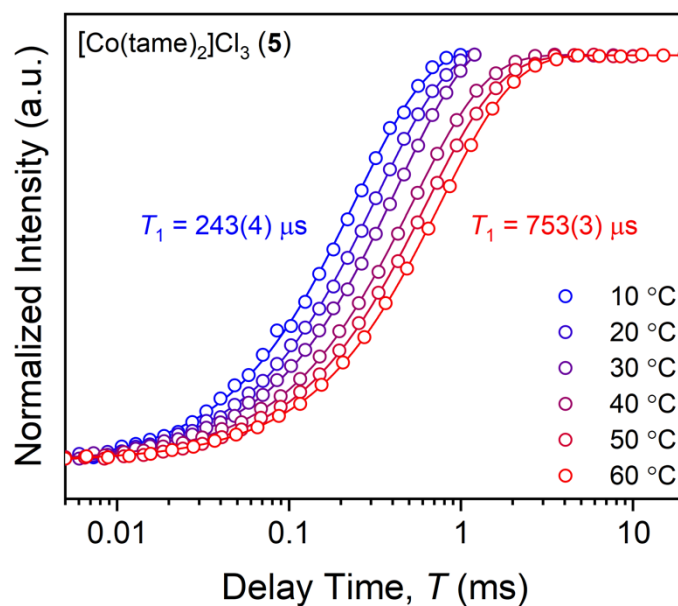

**Figure S5.** Variable temperature inversion recovery of complex **5** over a 10-60 °C temperature range at 30 mM concentration. Inversion recovery data (circles) are fit to relaxation curves (lines) to parameterize  $T_1$  over a range of 243(4) to 753(3) μs with temperature.

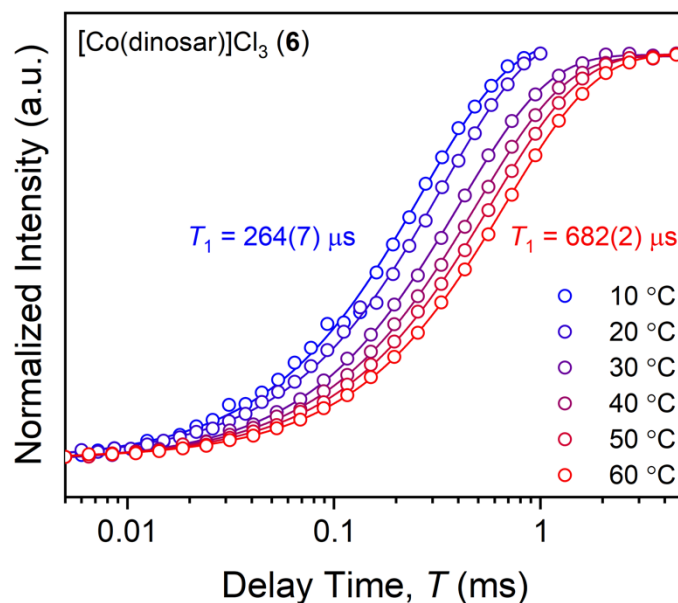

**Figure S6.** Variable temperature inversion recovery of complex **6** over a 10-60 °C temperature range at 30 mM concentration. Inversion recovery data (circles) are fit to relaxation curves (lines) to parameterize  $T_1$  over a range of 264(7) to 682(2)  $\mu\text{s}$  with temperature.

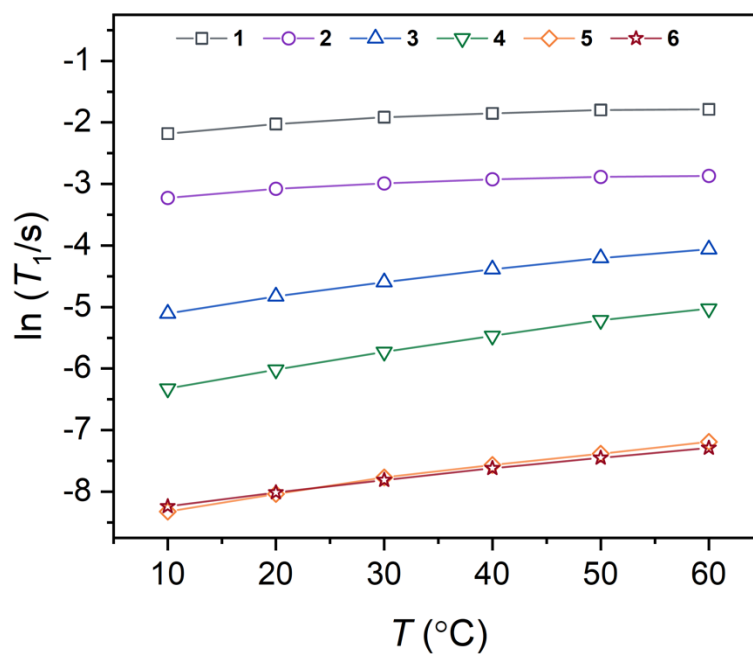

**Figure S7.** Variable temperature trends of  $\ln(T_1/\text{s})$  vs.  $T$  (°C) from fitted  $T_1$  values. Colored traces are guides for the eye.

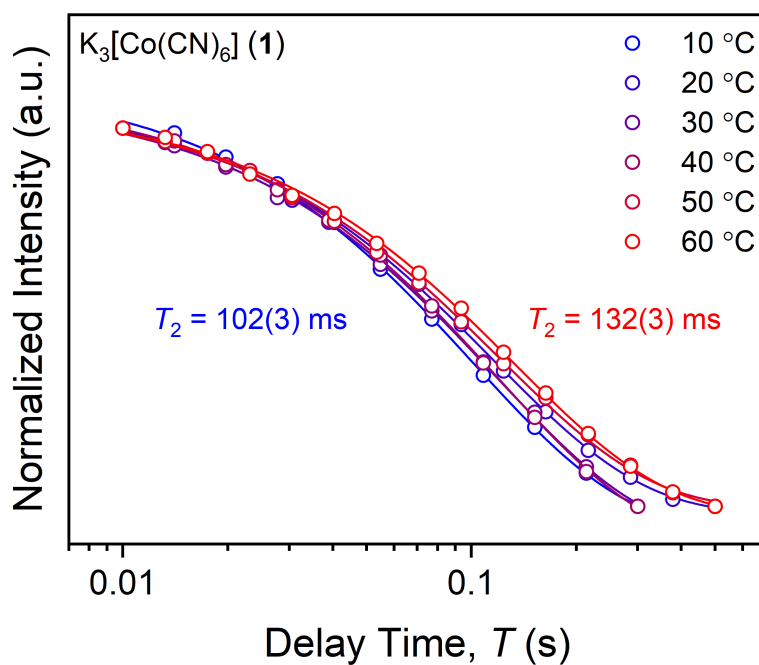

**Figure S8.** Variable temperature CPMG data of complex 1 over a 10-60 °C temperature range at 30 mM concentration. CPMG data (circles) are fit to relaxation curves (lines) to parameterize  $T_2$  over a range of 102(3) to 132(3) ms with temperature.

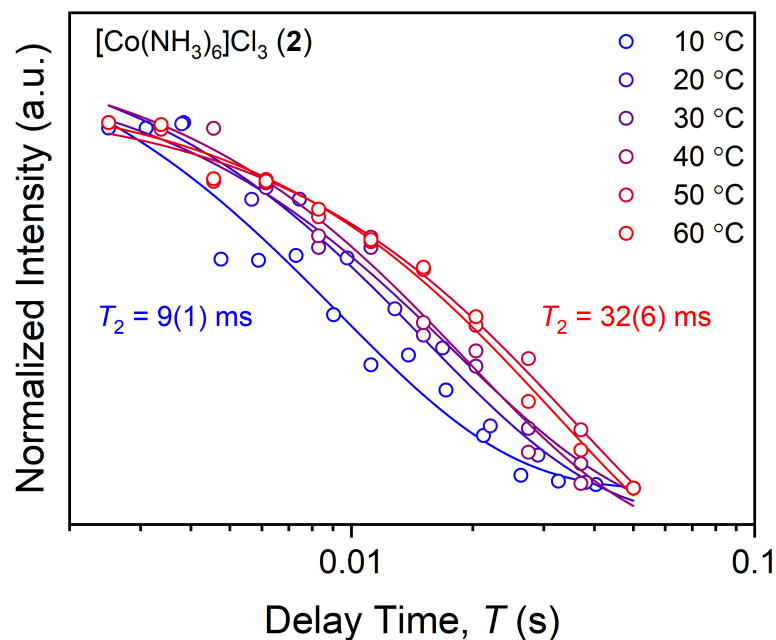

**Figure S9.** Variable temperature CPMG data of complex 2 over a 10-60 °C temperature range at 30 mM concentration. CPMG data (circles) are fit to relaxation curves (lines) to parameterize  $T_2$  over a range of 9(1) to 32(6) ms with temperature.

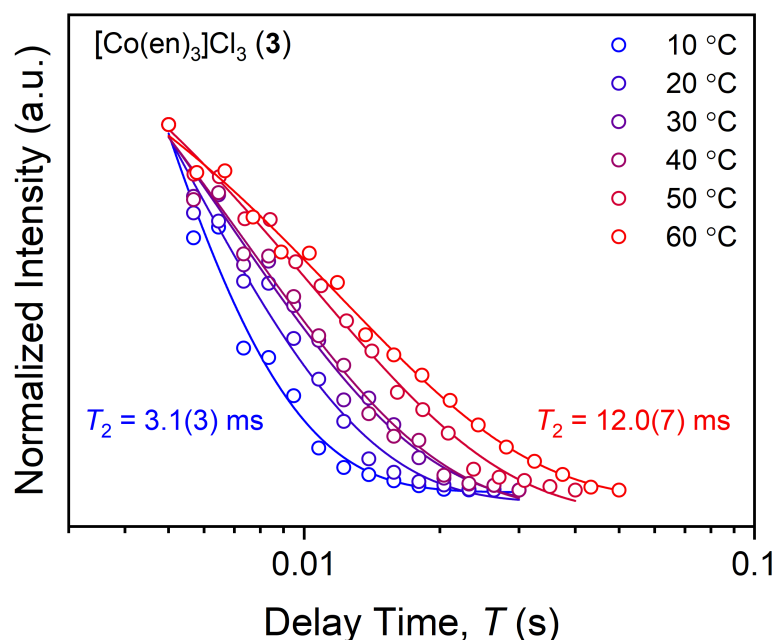

**Figure S10.** Variable temperature CPMG data of complex 3 over a 10-60 °C temperature range at 30 mM concentration. CPMG data (circles) are fit to relaxation curves (lines) to parameterize  $T_2$  over a range of 3.1(3) to 12.0(7) ms with temperature.

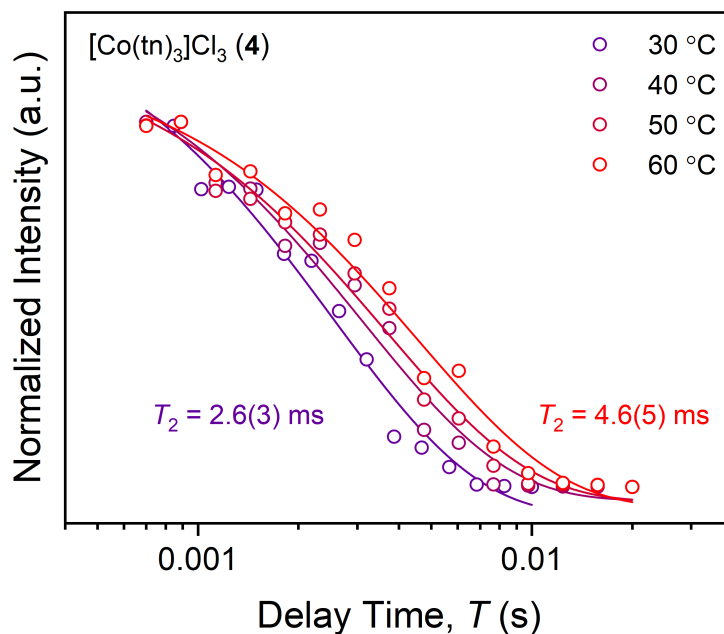

**Figure S11.** Variable temperature CPMG data of complex 4 over a 30-60 °C temperature range at 30 mM concentration. CPMG data (circles) are fit to relaxation curves (lines) to parameterize  $T_2$  over a range of 2.6(3) to 4.6(5) ms with temperature.

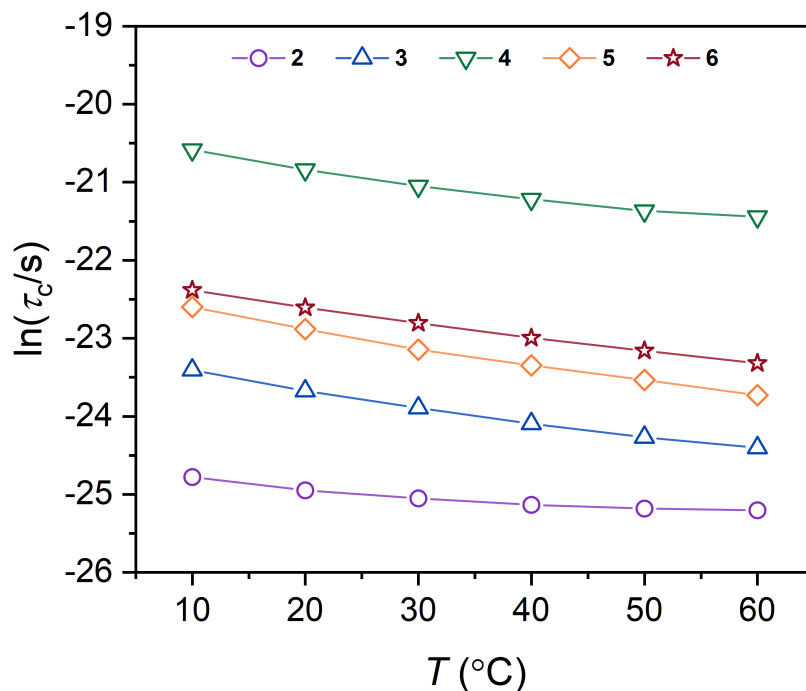

**Figure S12.** Variable-temperature correlation time,  $\tau_c$  (s) trends on a logarithmic scale. Traces are guides for the eye. Calculated from values of  $\tau_c$  are compiled in Table S3, determined from Eq. 3 (above).

**Table S4.** Computed coordinates of  $[\text{Co}(\text{en})_3]\text{Cl}_3$  (**3**) with fixed Co–N<sub>6</sub> bond distances from previous 13 °C EXAFS data (1.9694(5) Å). Total energy: -1953.43347520 Hartrees

| Symbol | x           | y           | z           |
|--------|-------------|-------------|-------------|
| Co     | 0.00007964  | -0.00016764 | 0.00031164  |
| C      | 0.89173474  | 2.61316490  | 0.74934824  |
| C      | 1.93710856  | -1.96657225 | -0.75055951 |
| C      | 1.81808218  | -2.07805438 | 0.74955723  |
| H      | 2.33267589  | 0.03607462  | -1.00890472 |
| H      | 1.34069901  | -0.54747408 | -2.11808332 |
| H      | -0.20836619 | -2.32363484 | 1.00909271  |
| H      | 0.44794361  | -1.37804768 | 2.11816861  |
| H      | -0.01304352 | 2.95425925  | 1.25776881  |
| H      | 1.71480354  | 3.23941669  | 1.09739793  |
| H      | 1.26909287  | -2.66591634 | -1.25866368 |
| H      | 2.94996663  | -2.17393474 | -1.09966290 |
| H      | 1.94948155  | -3.10385570 | 1.09776376  |
| H      | 2.56565918  | -1.46460195 | 1.25776887  |
| H      | 0.96971114  | 1.07658492  | 2.11793816  |

|   |             |             |             |
|---|-------------|-------------|-------------|
| H | 2.11693722  | 0.98039701  | 1.00921898  |
| N | 1.12140551  | 1.17432481  | 1.11460698  |
| N | 1.51985922  | -0.57045710 | -1.11481094 |
| N | 0.45704447  | -1.55820877 | 1.11482917  |
| N | -0.26612128 | 1.60160367  | -1.11410483 |
| N | -1.57760981 | 0.38357793  | 1.11480421  |
| N | -1.25450187 | -1.03166537 | -1.11346394 |
| C | 0.73478814  | 2.66094359  | -0.75065921 |
| H | -0.19787894 | 1.43513017  | -2.11752539 |
| H | -1.19758324 | 2.00245317  | -1.00684595 |
| C | -2.70964608 | -0.53377578 | 0.74943529  |
| H | -1.90632569 | 1.34313450  | 1.00988501  |
| H | -1.41701885 | 0.30042019  | 2.11807296  |
| C | -2.67226774 | -0.69412936 | -0.75040950 |
| H | -1.13604536 | -2.03871317 | -1.00570662 |
| H | -1.14472574 | -0.88993256 | -2.11700203 |
| H | 1.67416681  | 2.43263471  | -1.25948063 |
| H | 0.40747357  | 3.64181683  | -1.09929780 |
| H | -2.55401465 | -1.48777875 | 1.25846218  |
| H | -3.66332902 | -0.13301734 | 1.09679191  |
| H | -3.35815306 | -1.46795921 | -1.09904477 |
| H | -2.94360960 | 0.23338406  | -1.25982596 |

**Table S5.** Computed coordinates of [Co(en)<sub>3</sub>]Cl<sub>3</sub> (**3**) with fixed Co–N<sub>6</sub> bond distances from previous 35 °C EXAFS data (1.9706(5) Å). Total energy: -1953.43368251 Hartrees

| Symbol | x           | y           | z           |
|--------|-------------|-------------|-------------|
| Co     | 0.00000706  | -0.00017152 | 0.00025222  |
| C      | 0.17550713  | 2.75683253  | 0.74935382  |
| C      | 2.38563166  | -1.39131003 | -0.75053436 |
| C      | 2.29979109  | -1.53002972 | 0.74974107  |
| H      | 2.24330749  | 0.64527030  | -1.00868895 |
| H      | 1.43962576  | -0.17722466 | -2.11855791 |
| H      | 0.40858394  | -2.29819727 | 1.01004048  |
| H      | 0.79447600  | -1.21395733 | 2.11887920  |
| H      | -0.78716014 | 2.84885788  | 1.25759261  |
| H      | 0.80590603  | 3.57659474  | 1.09772468  |
| H      | 1.92416563  | -2.24122598 | -1.25861146 |
| H      | 3.41739483  | -1.32578378 | -1.09974342 |
| H      | 2.69488947  | -2.48558464 | 1.09842992  |
| H      | 2.86051377  | -0.74195370 | 1.25768552  |

|   |             |             |             |
|---|-------------|-------------|-------------|
| H | 0.65418695  | 1.29511874  | 2.11840133  |
| H | 1.78605569  | 1.50277484  | 1.00940050  |
| N | 0.77442288  | 1.42856948  | 1.11481230  |
| N | 1.61749119  | -0.15289548 | -1.11495421 |
| N | 0.84997475  | -1.38489635 | 1.11531141  |
| N | -0.67647665 | 1.47713777  | -1.11473294 |
| N | -1.62412082 | -0.04348867 | 1.11541907  |
| N | -0.94132988 | -1.32474338 | -1.11449397 |
| C | 0.01216318  | 2.76161311  | -0.75089377 |
| H | -0.56689621 | 1.33505808  | -2.11836161 |
| H | -1.68054904 | 1.62028078  | -1.00819176 |
| C | -2.47512458 | -1.22617111 | 0.75002811  |
| H | -2.19400901 | 0.79568171  | 1.01036858  |
| H | -1.44811812 | -0.08114875 | 2.11893271  |
| C | -2.39798108 | -1.36996842 | -0.75022530 |
| H | -0.56360930 | -2.26599225 | -1.00767669 |
| H | -0.87319502 | -1.15919385 | -2.11818921 |
| H | 0.97882745  | 2.78674451  | -1.25923512 |
| H | -0.56051345 | 3.62231871  | -1.10018432 |
| H | -2.07324124 | -2.10590020 | 1.25805086  |
| H | -3.50017578 | -1.09014548 | 1.09864615  |
| H | -2.85742396 | -2.29612616 | -1.09938277 |
| H | -2.90288705 | -0.54521676 | -1.25848813 |

**Table S6.** Computed coordinates of  $[\text{Co}(\text{en})_3]\text{Cl}_3$  (**3**) with fixed Co–N<sub>6</sub> bond distances from previous 57 °C EXAFS data (1.9714(5) Å). Total energy: -1953.43280799 Hartrees

| Symbol | x           | y           | z           |
|--------|-------------|-------------|-------------|
| Co     | 0.00019508  | 0.00004906  | 0.00060861  |
| C      | 2.75615827  | 0.19294588  | 0.74938480  |
| C      | -1.06182947 | -2.54904138 | -0.75088589 |
| C      | -1.21193373 | -2.48274823 | 0.74925518  |
| H      | 0.93861878  | -2.13851295 | -1.00506315 |
| H      | 0.01928172  | -1.45134510 | -2.11780278 |
| H      | -2.22332871 | -0.70966434 | 1.00992409  |
| H      | -1.09728881 | -0.94900061 | 2.11899024  |
| H      | 2.71984672  | 1.15957439  | 1.25716555  |
| H      | 3.65296814  | -0.32234108 | 1.09726475  |
| H      | -1.96485164 | -2.20381558 | -1.25968768 |
| H      | -0.86092912 | -3.56328343 | -1.09985472 |
| H      | -2.10707252 | -3.00122634 | 1.09666328  |

|   |             |             |             |
|---|-------------|-------------|-------------|
| H | -0.35720846 | -2.93496034 | 1.25762390  |
| H | 1.37091940  | -0.47430937 | 2.11939392  |
| H | 1.72702692  | -1.56974655 | 1.01095750  |
| N | 1.51975921  | -0.57689452 | 1.11613569  |
| N | 0.06469696  | -1.62455438 | -1.11422003 |
| N | -1.26005644 | -1.02695564 | 1.11567238  |
| N | 1.37489372  | 0.86744891  | -1.11481097 |
| N | -0.25994628 | 1.60522255  | 1.11509697  |
| N | -1.43824840 | 0.75621346  | -1.11538221 |
| C | 2.73877837  | 0.35477460  | -0.75085231 |
| H | 1.24780399  | 0.74021766  | -2.11825263 |
| H | 1.38301300  | 1.88137356  | -1.00699630 |
| C | -1.54567948 | 2.28972792  | 0.74914383  |
| H | 0.49539222  | 2.28187817  | 1.00844047  |
| H | -0.27296466 | 1.42592823  | 2.11854793  |
| C | -1.67751974 | 2.19355820  | -0.75105813 |
| H | -2.32006227 | 0.25548143  | -1.00845364 |
| H | -1.26365264 | 0.71020521  | -2.11868480 |
| H | 2.89146450  | -0.60028826 | -1.25885022 |
| H | 3.51666532  | 1.03568240  | -1.10024273 |
| H | -2.36384022 | 1.77411307  | 1.25732587  |
| H | -1.54868110 | 3.32398979  | 1.09715355  |
| H | -2.65649283 | 2.52592546  | -1.10025295 |
| H | -0.92743153 | 2.80413543  | -1.25910970 |

**Table S7.** Computed coordinates of [Co(tn)<sub>3</sub>]Cl<sub>3</sub> (**4**) with fixed Co–N<sub>6</sub> bond distances from previous 13 °C EXAFS data (1.9825(5) Å). Total energy: -2071.43715806 Hartrees

| Symbol | x           | y           | z           |
|--------|-------------|-------------|-------------|
| Co     | 0.00082394  | -0.00002603 | -0.09780114 |
| C      | -1.67282784 | -2.17837128 | 1.24936642  |
| C      | -1.77491496 | -2.90315556 | -0.07575167 |
| C      | -0.45650228 | -2.95717548 | -0.81567793 |
| C      | 2.72373640  | -0.35588755 | 1.25023271  |
| C      | 3.40342413  | -0.08269594 | -0.07456158 |
| C      | 2.78952128  | 1.08354880  | -0.81730302 |
| C      | -1.05366242 | 2.53618474  | 1.24881154  |
| C      | -1.63271379 | 2.98669205  | -0.07539859 |
| C      | -2.33446143 | 1.87051619  | -0.81725600 |
| H      | -2.32720288 | -0.32451903 | 0.73126376  |
| H      | 0.41907415  | 1.33548225  | 1.99310469  |

|   |             |             |             |
|---|-------------|-------------|-------------|
| H | -1.98804116 | 0.03629590  | -1.61380668 |
| H | -0.95854105 | 1.14261209  | -2.12762713 |
| H | -0.85379547 | -2.58105273 | 1.84953281  |
| H | -2.58662465 | -2.30451453 | 1.83258381  |
| H | -2.09174256 | -3.92988912 | 0.11991995  |
| H | -2.56551387 | -2.47155450 | -0.70155007 |
| H | 0.31912715  | -3.38878179 | -0.17824541 |
| H | -0.52689688 | -3.59751468 | -1.69644582 |
| H | 2.66029410  | 0.55557102  | 1.84890315  |
| H | -1.35844103 | -0.30601111 | 1.99696177  |
| H | 3.29070317  | -1.08209232 | 1.83525507  |
| H | 4.45033630  | 0.15869951  | 0.12176674  |
| H | 3.42733950  | -0.98422107 | -0.69877502 |
| H | 2.77380214  | 1.97243504  | -0.18182372 |
| H | 3.37933387  | 1.34169038  | -1.69833838 |
| H | -1.80950426 | 2.02467818  | 1.84901788  |
| H | -0.70867367 | 3.39119469  | 1.83278618  |
| H | -2.36652370 | 3.77124442  | 0.12169140  |
| H | -0.86559572 | 3.45953241  | -0.70061152 |
| H | -3.09585915 | 1.41190671  | -0.18150223 |
| H | 0.96371313  | -1.74425618 | -1.61006990 |
| H | -2.85369763 | 2.25109730  | -1.69833702 |
| H | -0.50697896 | -1.40254490 | -2.12753042 |
| H | 1.44978775  | -1.85200810 | 0.72960481  |
| H | 0.94638533  | -1.02549379 | 1.99625442  |
| H | 1.02889230  | 1.70249829  | -1.61480012 |
| H | 1.47028817  | 0.25694854  | -2.12763835 |
| H | 0.87830325  | 2.18373158  | 0.72399074  |
| N | -1.44260765 | -0.70684239 | 1.06281267  |
| N | 0.01216135  | -1.59799250 | -1.27103737 |
| N | 1.33570777  | -0.89553023 | 1.06248588  |
| N | 1.37871252  | 0.80669814  | -1.27284486 |
| N | 0.10896238  | 1.60574993  | 1.05973859  |
| N | -1.38802044 | 0.78814600  | -1.27253716 |

**Table S8.** Computed coordinates of [Co(tn)<sub>3</sub>]Cl<sub>3</sub> (**4**) with fixed Co–N<sub>6</sub> bond distances from previous 35 °C EXAFS data (1.9881(5) Å). Total energy: -2071.43959515 Hartrees

| Symbol | x           | y          | z           |
|--------|-------------|------------|-------------|
| Co     | -0.00047770 | 0.00001042 | -0.09864853 |
| C      | 1.65713891  | 2.19355690 | 1.25071602  |

|   |             |             |             |
|---|-------------|-------------|-------------|
| C | 1.75385978  | 2.91927955  | -0.07445244 |
| C | 0.43591109  | 2.96392578  | -0.81621854 |
| C | -2.72902004 | 0.33678225  | 1.25098215  |
| C | -3.40625076 | 0.05731522  | -0.07392494 |
| C | -2.78482696 | -1.10512844 | -0.81670927 |
| C | 1.07321152  | -2.53103862 | 1.25032354  |
| C | 1.65492809  | -2.97724353 | -0.07429306 |
| C | 2.35008781  | -1.85720121 | -0.81687628 |
| H | 2.32936170  | 0.34598104  | 0.73108147  |
| H | -0.40870314 | -1.34150001 | 1.99578641  |
| H | 1.99210579  | -0.02637329 | -1.61780756 |
| H | 0.96964749  | -1.14077050 | -2.12993827 |
| H | 0.83344980  | 2.58814275  | 1.84990310  |
| H | 2.56899456  | 2.32917067  | 1.83490344  |
| H | 2.06242557  | 3.94842113  | 0.12179462  |
| H | 2.54843360  | 2.49421810  | -0.69968032 |
| H | -0.34406204 | 3.38821371  | -0.17916260 |
| H | 0.50278324  | 3.60664848  | -1.69555684 |
| H | -2.65777072 | -0.57387020 | 1.84999143  |
| H | 1.36138157  | 0.31739414  | 1.99816940  |
| H | -3.30286161 | 1.05798436  | 1.83554743  |
| H | -4.45133673 | -0.19154465 | 0.12282760  |
| H | -3.43704034 | 0.95823808  | -0.69869428 |
| H | -2.76093158 | -1.99321373 | -0.18037356 |
| H | -3.37494251 | -1.36864382 | -1.69598996 |
| H | 1.82530377  | -2.01304023 | 1.84968466  |
| H | 0.73625957  | -3.38897494 | 1.83476756  |
| H | 2.39368341  | -3.75715564 | 0.12274859  |
| H | 0.89079902  | -3.45509497 | -0.69936497 |
| H | 3.10711245  | -1.39222022 | -0.18055386 |
| H | -0.97395352 | 1.74113529  | -1.61519611 |
| H | 2.87354086  | -2.23603489 | -1.69624913 |
| H | 0.50081316  | 1.41056284  | -2.13018196 |
| H | -1.46708545 | 1.84374346  | 0.72970512  |
| H | -0.95704180 | 1.02171084  | 1.99752871  |
| H | -1.02098006 | -1.71146317 | -1.61827077 |
| H | -1.47390793 | -0.26836428 | -2.12982665 |
| H | -0.86243109 | -2.19380974 | 0.72650076  |
| N | 1.44202919  | 0.72015104  | 1.06458556  |
| N | -0.02172985 | 1.60257226  | -1.27503540 |
| N | -1.34611266 | 0.88867714  | 1.06414130  |

|   |             |             |             |
|---|-------------|-------------|-------------|
| N | -1.37761739 | -0.81858090 | -1.27590666 |
| N | -0.09714474 | -1.61075224 | 1.06266165  |
| N | 1.39766321  | -0.78224721 | -1.27585590 |

**Table S9.** Computed coordinates of [Co(tn)<sub>3</sub>]Cl<sub>3</sub> (**4**) with fixed Co–N<sub>6</sub> bond distances from previous 57 °C EXAFS data (1.9910(5) Å). Total energy: -2071.43833732 Hartrees

| Symbol | x           | y           | z           |
|--------|-------------|-------------|-------------|
| Co     | -0.00091913 | 0.00005460  | -0.09993031 |
| C      | 1.72968398  | 2.13716024  | 1.25236300  |
| C      | 1.85144179  | 2.86009847  | -0.07230998 |
| C      | 0.53644922  | 2.94992895  | -0.81524822 |
| C      | -2.71742800 | 0.42655991  | 1.25256303  |
| C      | -3.40500936 | 0.16936571  | -0.07155763 |
| C      | -2.82267295 | -1.01201418 | -0.81618102 |
| C      | 0.98951459  | -2.56553382 | 1.25119378  |
| C      | 1.55848757  | -3.03101633 | -0.07235868 |
| C      | 2.28925096  | -1.93460636 | -0.81601186 |
| H      | 2.34132165  | 0.26906883  | 0.73050887  |
| H      | -0.45779294 | -1.33147320 | 1.99363145  |
| H      | 1.98946628  | -0.09600752 | -1.62353816 |
| H      | 0.93088217  | -1.17886382 | -2.13045624 |
| H      | 0.91876822  | 2.55806185  | 1.85103449  |
| H      | 2.64498254  | 2.24285247  | 1.83737078  |
| H      | 2.19439061  | 3.87812225  | 0.12486583  |
| H      | 2.63166053  | 2.40889669  | -0.69730107 |
| H      | -0.22950832 | 3.39928041  | -0.17841510 |
| H      | 0.62603808  | 3.59136791  | -1.69351736 |
| H      | -2.67443393 | -0.48607554 | 1.85122464  |
| H      | 1.37320310  | 0.27046558  | 1.99824246  |
| H      | -3.26757078 | 1.16536513  | 1.83795045  |
| H      | -4.45726013 | -0.04589608 | 0.12672119  |
| H      | -3.40781805 | 1.07112552  | -0.69585205 |
| H      | -2.82586075 | -1.90074000 | -0.18032877 |
| H      | -3.42307162 | -1.25584902 | -1.69418928 |
| H      | 1.75661485  | -2.07054049 | 1.85094231  |
| H      | 0.62567150  | -3.41220418 | 1.83595691  |
| H      | 2.27228444  | -3.83342082 | 0.12643404  |
| H      | 0.78040694  | -3.48546184 | -0.69764691 |
| H      | 3.05985762  | -1.49237972 | -0.17978890 |
| H      | -0.91269171 | 1.77637865  | -1.61836573 |

|   |             |             |             |
|---|-------------|-------------|-------------|
| H | 2.80144699  | -2.33157641 | -1.69402653 |
| H | 0.55100365  | 1.39630437  | -2.13101869 |
| H | -1.40888765 | 1.89244371  | 0.72838000  |
| H | -0.92373748 | 1.05619792  | 1.99704980  |
| H | -1.08177060 | -1.67342844 | -1.62486358 |
| H | -1.48821784 | -0.21430680 | -2.13037627 |
| H | -0.93346219 | -2.16888362 | 0.72203913  |
| N | 1.46708930  | 0.67173276  | 1.06530006  |
| N | 0.03373440  | 1.60560892  | -1.27677211 |
| N | -1.31810450 | 0.93461726  | 1.06436240  |
| N | -1.40824592 | -0.77055848 | -1.27872162 |
| N | -0.15177676 | -1.61004144 | 1.06144599  |
| N | 1.37167413  | -0.83135239 | -1.27836670 |

**Table S10.** Computed coordinates of [Co(tame)<sub>2</sub>]Cl<sub>3</sub> (**5**) with fixed Co–N<sub>6</sub> bond distances from previous 13 °C EXAFS data (1.9700(5) Å). Total energy: -2109.54797542 Hartrees

| Symbol | x           | y           | z           |
|--------|-------------|-------------|-------------|
| Co     | -0.00000347 | 0.00026855  | 0.00013800  |
| N      | -1.16688756 | -1.36565803 | 0.80857250  |
| N      | -1.16696618 | -0.01657170 | -1.58695199 |
| N      | 1.16676891  | -1.43273672 | -0.68256134 |
| N      | -1.16734922 | 1.38306928  | 0.77866627  |
| N      | 1.16708267  | 1.30778504  | -0.89944564 |
| N      | 1.16729811  | 0.12585389  | 1.58209106  |
| C      | -4.64680352 | -0.00048948 | -0.00030824 |
| C      | -3.11426948 | -0.00032950 | -0.00007533 |
| C      | -2.60840971 | -0.99667970 | 1.04747613  |
| C      | -2.60810793 | -0.40917475 | -1.38666869 |
| C      | -2.60868229 | 1.40509670  | 0.33918814  |
| C      | 2.60826729  | -1.08671343 | -0.95383579 |
| C      | 3.11426447  | -0.00023486 | -0.00017904 |
| C      | 4.64681594  | -0.00052409 | -0.00019484 |
| C      | 2.60847624  | -0.28292936 | 1.41761373  |
| C      | 2.60857697  | 1.36906715  | -0.46396050 |
| H      | -1.17927408 | -2.17178325 | 0.18471381  |
| H      | -0.80696977 | -0.57782351 | -2.35828537 |
| H      | 0.80665405  | -1.89602002 | -1.51638867 |
| H      | -1.17997696 | 1.24590158  | 1.78872434  |
| H      | 1.17923630  | 1.08134022  | -1.89329024 |
| H      | 0.80760127  | -0.36408281 | 2.40072487  |

|   |             |             |             |
|---|-------------|-------------|-------------|
| H | -5.03823579 | -0.94835206 | -0.37485339 |
| H | -5.03853196 | 0.14911460  | 1.00771240  |
| H | 5.03838498  | 0.05747337  | -1.01767911 |
| H | -3.20353192 | -1.91097901 | 1.02017900  |
| H | -2.69895608 | -1.48658235 | -1.53877537 |
| H | -2.70038243 | 2.07558247  | -0.51769056 |
| H | 3.20329668  | -1.99490842 | -0.84440876 |
| H | 2.69952799  | -1.34231745 | 1.66583596  |
| H | 3.20387882  | 1.72857178  | -1.30491224 |
| H | -0.80689062 | -1.75209423 | 1.68070945  |
| H | -1.17997355 | 0.92696462  | -1.97264836 |
| H | 1.17920999  | -2.17956753 | 0.01117579  |
| H | -0.80782756 | 2.33182585  | 0.67758156  |
| H | 0.80731307  | 2.26165035  | -0.88315728 |
| H | 1.18025773  | 1.10015339  | 1.88164753  |
| H | -5.03831812 | 0.79772414  | -0.63398939 |
| H | 5.03817798  | -0.91082842 | 0.45821381  |
| H | 5.03854261  | 0.85151785  | 0.55884749  |
| H | -2.70025774 | -0.59009094 | 2.05666919  |
| H | -3.20369694 | 0.07083907  | -2.16494168 |
| H | -3.20413793 | 1.83859331  | 1.14439121  |
| H | 2.70008237  | -0.77266469 | -1.99553305 |
| H | 3.20416550  | 0.26513040  | 2.14947802  |
| H | 2.70033074  | 2.11373663  | 0.32929369  |

**Table S11.** Computed coordinates of [Co(tame)<sub>2</sub>]<sub>2</sub>Cl<sub>3</sub> (**5**) with fixed Co–N<sub>6</sub> bond distances from previous 35 °C EXAFS data (1.9698(5) Å). Total energy: -2109.54887608 Hartrees

| Symbol | x           | y           | z           |
|--------|-------------|-------------|-------------|
| Co     | 0.00000097  | 0.00072136  | 0.00018597  |
| N      | 1.16625438  | -1.22688610 | -1.00626598 |
| N      | 1.16706731  | -0.25646809 | 1.56604750  |
| N      | -1.16624230 | -1.51940555 | 0.45757358  |
| N      | 1.16720556  | 1.48542682  | -0.55963163 |
| N      | -1.16738390 | 1.15656640  | 1.08708403  |
| N      | -1.16692513 | 0.36488948  | -1.54441032 |
| C      | 4.64678658  | -0.00140353 | -0.00003446 |
| C      | 3.11409782  | -0.00066163 | -0.00015564 |
| C      | 2.60797535  | -0.82642351 | -1.18663075 |
| C      | 2.60798268  | -0.61506824 | 1.30837059  |
| C      | 2.60890918  | 1.44005620  | -0.12221780 |

|   |             |             |             |
|---|-------------|-------------|-------------|
| C | -2.60776433 | -1.21883315 | 0.77835707  |
| C | -3.11410115 | -0.00088924 | -0.00010227 |
| C | -4.64675639 | -0.00149225 | -0.00045140 |
| C | -2.60790341 | -0.06516864 | -1.44429970 |
| C | -2.60922217 | 1.28237159  | 0.66614310  |
| H | 1.17854770  | -2.11848127 | -0.51214917 |
| H | 0.80706155  | -0.92708393 | 2.24452801  |
| H | -0.80616597 | -2.10404511 | 1.21135349  |
| H | 1.17970409  | 1.50323728  | -1.57882998 |
| H | -1.17949465 | 0.78235538  | 2.03525345  |
| H | -0.80684594 | 0.00634557  | -2.42840392 |
| H | 5.03775152  | -0.99517605 | 0.22693691  |
| H | 5.03862902  | 0.29865023  | -0.97387286 |
| H | -5.03844289 | -0.09854110 | 1.01398610  |
| H | 3.20256966  | -1.73460406 | -1.29832066 |
| H | 2.69820354  | -1.70313731 | 1.29520854  |
| H | 2.70091450  | 1.97310264  | 0.82626181  |
| H | -3.20254208 | -2.10025785 | 0.53312317  |
| H | -2.69827228 | -1.07460599 | -1.85058157 |
| H | -3.20437046 | 1.50962570  | 1.55212015  |
| H | 0.80634568  | -1.47660876 | -1.92699805 |
| H | 1.18112734  | 0.61833775  | 2.08925675  |
| H | -1.17878072 | -2.15234719 | -0.34146388 |
| H | 0.80831522  | 2.40808577  | -0.31560748 |
| H | -0.80865173 | 2.10236077  | 1.21524170  |
| H | -1.18094868 | 1.37357461  | -1.69148136 |
| H | 5.03857955  | 0.69164267  | 0.74703192  |
| H | -5.03784634 | -0.83178717 | -0.59171792 |
| H | -5.03856541 | 0.92541617  | -0.42386462 |
| H | 2.69987786  | -0.27151409 | -2.12247784 |
| H | 3.20370959  | -0.25895001 | 2.15045728  |
| H | 3.20413306  | 1.99038595  | -0.85273026 |
| H | -2.69920955 | -1.06551568 | 1.85554883  |
| H | -3.20355929 | 0.58743209  | -2.08471047 |
| H | -2.70165623 | 2.13883980  | -0.00477191 |

**Table S12.** Computed coordinates of [Co(tame)<sub>2</sub>]Cl<sub>3</sub> (**5**) with fixed Co–N<sub>6</sub> bond distances from previous 57 °C EXAFS data (1.9707(5) Å). Total energy: -2109.54796698 Hartrees

| Symbol | x           | y          | z          |
|--------|-------------|------------|------------|
| Co     | -0.00002601 | 0.00074305 | 0.00055857 |

|   |             |             |             |
|---|-------------|-------------|-------------|
| N | -1.16688893 | -1.54889778 | 0.34769887  |
| N | -1.16733941 | 0.47520857  | -1.51460612 |
| N | 1.16675876  | -1.15213634 | -1.09166143 |
| N | -1.16810024 | 1.07590680  | 1.16807191  |
| N | 1.16767954  | 1.52238978  | -0.45167702 |
| N | 1.16772835  | -0.36794571 | 1.54454054  |
| C | -4.64682460 | -0.00154565 | -0.00119689 |
| C | -3.11412683 | -0.00082791 | -0.00051572 |
| C | -2.60842817 | -1.27169381 | 0.68852041  |
| C | -2.60803758 | 0.03871999  | -1.44557743 |
| C | -2.60969110 | 1.23131967  | 0.75641952  |
| C | 2.60821662  | -0.73969065 | -1.24293472 |
| C | 3.11427754  | -0.00076721 | -0.00048792 |
| C | 4.64695022  | -0.00148864 | -0.00069595 |
| C | 2.60846886  | -0.70707874 | 1.26107404  |
| C | 2.60951949  | 1.44510545  | -0.01941544 |
| H | -1.17864676 | -2.12277741 | -0.49468067 |
| H | -0.80677893 | 0.18135110  | -2.42188505 |
| H | 0.80647093  | -1.33571692 | -2.02762587 |
| H | -1.18032488 | 0.63333990  | 2.08627004  |
| H | 1.17922811  | 1.61357971  | -1.46689901 |
| H | 0.80765614  | -1.08528670 | 2.17329448  |
| H | -5.03765208 | -0.78714590 | -0.65084548 |
| H | -5.03866420 | -0.17150296 | 1.00355136  |
| H | 5.03852600  | 0.36689361  | -0.95091189 |
| H | -3.20353399 | -2.13294357 | 0.38048083  |
| H | -2.69793646 | -0.93916962 | -1.92286281 |
| H | -2.70185214 | 2.13368231  | 0.14862430  |
| H | 3.20324055  | -1.63726316 | -1.41932402 |
| H | 2.69853199  | -1.79138387 | 1.16989326  |
| H | 3.20474362  | 2.04584415  | -0.70905859 |
| H | -0.80705120 | -2.18569275 | 1.05802044  |
| H | -1.18119961 | 1.49184356  | -1.58780778 |
| H | 1.17882710  | -2.07632818 | -0.66170068 |
| H | -0.80936177 | 2.00981834  | 1.36466970  |
| H | 0.80878644  | 2.42471475  | -0.14101085 |
| H | 1.18162678  | 0.46749007  | 2.12848500  |
| H | -5.03858883 | 0.95345192  | -0.35680223 |
| H | 5.03791828  | -1.00886567 | 0.15516446  |
| H | 5.03882367  | 0.63688084  | 0.79356489  |
| H | -2.70034793 | -1.19588617 | 1.77386806  |

|   |             |             |             |
|---|-------------|-------------|-------------|
| H | -3.20431575 | 0.73503032  | -2.03755347 |
| H | -3.20537625 | 1.39429482  | 1.65606938  |
| H | 2.69999732  | -0.11896823 | -2.13648700 |
| H | 3.20491356  | -0.41235309 | 2.12607724  |
| H | 2.70222954  | 1.90901407  | 0.96463377  |

**Table S13.** Computed coordinates of [Co(dinosar)]Cl<sub>3</sub> (**6**) with fixed Co–N<sub>6</sub> bond distances from previous 13 °C EXAFS data (1.9701(5) Å). Total energy: -2672.10724547 Hartrees

| Symbol | x           | y           | z           |
|--------|-------------|-------------|-------------|
| Co     | -0.00001941 | 0.00000970  | -0.00322799 |
| N      | 4.58102675  | -0.00318521 | 0.00587450  |
| O      | 5.15176360  | 1.05038301  | 0.11873404  |
| O      | 5.06236875  | -1.10611100 | -0.08226495 |
| C      | 3.04251516  | 0.03605914  | -0.00689277 |
| C      | 2.61600956  | -0.63741035 | -1.30755835 |
| C      | 2.60394321  | 1.49247291  | 0.06592851  |
| C      | 2.61923168  | -0.76362026 | 1.22367696  |
| N      | 1.13357426  | -0.85695034 | -1.36773535 |
| N      | 1.11224491  | 1.62460936  | -0.07279474 |
| N      | 1.13396349  | -0.73572627 | 1.42997503  |
| C      | 0.77475115  | -2.30690051 | -1.41543190 |
| C      | 0.72523630  | 2.39193991  | -1.29530838 |
| C      | 0.75075218  | -0.06252143 | 2.70786313  |
| H      | 0.85800159  | -0.49049625 | -2.27538880 |
| H      | 0.83910099  | 2.22031936  | 0.70475221  |
| H      | 0.87764424  | -1.71114226 | 1.56135256  |
| N      | -4.58106245 | 0.00335145  | 0.00593089  |
| O      | -5.15184120 | -1.05032380 | 0.11758247  |
| O      | -5.06235369 | 1.10637325  | -0.08114332 |
| C      | -3.04255293 | -0.03595083 | -0.00692876 |
| C      | -2.60405438 | -1.49245668 | 0.06446588  |
| C      | -2.61608262 | 0.63872278  | -1.30696591 |
| C      | -2.61921188 | 0.76260036  | 1.22436671  |
| N      | -1.11230278 | -1.62452641 | -0.07396472 |
| N      | -1.13360093 | 0.85797148  | -1.36711581 |
| N      | -1.13394933 | 0.73450172  | 1.43065482  |
| C      | -0.72501411 | -2.39122907 | -1.29677797 |
| C      | -0.77452698 | 2.30787173  | -1.41412714 |
| C      | -0.75075621 | 0.06009318  | 2.70791408  |

|   |             |             |             |
|---|-------------|-------------|-------------|
| H | -0.83938982 | -2.22060767 | 0.70337613  |
| H | -0.85816006 | 0.49184086  | -2.27493629 |
| H | -0.87760420 | 1.70978598  | 1.56296904  |
| H | 3.12974394  | -1.59476045 | -1.39912544 |
| H | 2.91804656  | -0.02375893 | -2.15818104 |
| H | 3.09225982  | 2.06895109  | -0.71938459 |
| H | 2.91540283  | 1.93254080  | 1.01308290  |
| H | 3.10925013  | -0.35931875 | 2.11157093  |
| H | 2.95184601  | -1.79616951 | 1.11625211  |
| H | 1.27006684  | -2.81407177 | -0.58394624 |
| H | 1.13770794  | -2.76576089 | -2.33701263 |
| H | 1.21733521  | 1.93796794  | -2.15898697 |
| H | 1.07222130  | 3.42490158  | -1.23045304 |
| H | 1.22948061  | 0.91927334  | 2.73888248  |
| H | 1.11334167  | -0.62816299 | 3.56826248  |
| H | -3.09215671 | -2.06805631 | -0.72162218 |
| H | -2.91581822 | -1.93354921 | 1.01104246  |
| H | -3.12959527 | 1.59628838  | -1.39748835 |
| H | -2.91839577 | 0.02602063  | -2.15817554 |
| H | -3.10924638 | 0.35753316  | 2.11190417  |
| H | -2.95178978 | 1.79525529  | 1.11783923  |
| H | -1.21706751 | -1.93689273 | -2.16029664 |
| H | -1.07187985 | -3.42426512 | -1.23247883 |
| H | -1.26979689 | 2.81470069  | -0.58239980 |
| H | -1.13737397 | 2.76723954  | -2.33549783 |
| H | -1.22950315 | -0.92172175 | 2.73802265  |
| H | -1.11334582 | 0.62493688  | 3.56883774  |

**Table S14.** Computed coordinates of [Co(dinosar)]Cl<sub>3</sub> (**6**) with fixed Co–N<sub>6</sub> bond distances from previous 35 °C EXAFS data (1.9751(6) Å). Total energy: -2627.10776777 Hartrees

| Symbol | x           | y           | z           |
|--------|-------------|-------------|-------------|
| Co     | -0.00000612 | 0.00000743  | -0.00319053 |
| N      | 4.58211821  | -0.00326077 | 0.00598911  |
| O      | 5.15304418  | 1.05052806  | 0.11583316  |
| O      | 5.06331305  | -1.10648798 | -0.07918376 |
| C      | 3.04333872  | 0.03611602  | -0.00691795 |
| C      | 2.61839494  | -0.64133181 | -1.30653270 |
| C      | 2.60626551  | 1.49363499  | 0.06180545  |
| C      | 2.62152785  | -0.76058757 | 1.22665161  |

|   |             |             |             |
|---|-------------|-------------|-------------|
| N | 1.13649010  | -0.86067920 | -1.37016453 |
| N | 1.11506477  | 1.62865567  | -0.07491884 |
| N | 1.13684280  | -0.73584421 | 1.43455772  |
| C | 0.77509870  | -2.30985870 | -1.41536941 |
| C | 0.72545590  | 2.39331978  | -1.29802657 |
| C | 0.75099071  | -0.06083911 | 2.71046686  |
| H | 0.86140310  | -0.49415796 | -2.27796724 |
| H | 0.84245268  | 2.22450934  | 0.70274097  |
| H | 0.88106090  | -1.71141438 | 1.56605993  |
| N | -4.58218430 | 0.00337833  | 0.00588206  |
| O | -5.15317880 | -1.05044671 | 0.11499076  |
| O | -5.06339996 | 1.10667860  | -0.07817561 |
| C | -3.04337780 | -0.03602482 | -0.00701109 |
| C | -2.60634379 | -1.49360059 | 0.06076777  |
| C | -2.61841027 | 0.64220504  | -1.30620935 |
| C | -2.62152625 | 0.75994577  | 1.22702928  |
| N | -1.11509634 | -1.62859625 | -0.07562657 |
| N | -1.13646107 | 0.86127552  | -1.36983260 |
| N | -1.13684693 | 0.73508376  | 1.43496070  |
| C | -0.72521615 | -2.39296436 | -1.29883163 |
| C | -0.77485213 | 2.31040716  | -1.41472823 |
| C | -0.75103082 | 0.05932112  | 2.71048118  |
| H | -0.84269916 | -2.22461432 | 0.70198013  |
| H | -0.86147082 | 0.49485943  | -2.27770459 |
| H | -0.88105282 | 1.71057068  | 1.56706267  |
| H | 3.13220560  | -1.59905387 | -1.39409634 |
| H | 2.92286240  | -0.03030540 | -2.15820039 |
| H | 3.09462481  | 2.06676982  | -0.72597525 |
| H | 2.92015970  | 1.93608966  | 1.00704590  |
| H | 3.11161604  | -0.35254731 | 2.11284753  |
| H | 2.95650523  | -1.79267337 | 1.12199629  |
| H | 1.26864745  | -2.81614702 | -0.58226712 |
| H | 1.13849478  | -2.77130135 | -2.33553722 |
| H | 1.21582557  | 1.93742587  | -2.16170709 |
| H | 1.07282412  | 3.42638233  | -1.23618597 |
| H | 1.22793556  | 0.92189163  | 2.73990308  |
| H | 1.11394474  | -0.62392368 | 3.57244233  |
| H | -3.09448797 | -2.06612334 | -0.72758787 |
| H | -2.92053892 | -1.93675984 | 1.00557874  |
| H | -3.13201112 | 1.60009967  | -1.39306733 |
| H | -2.92310317 | 0.03183171  | -2.15826712 |

|   |             |             |             |
|---|-------------|-------------|-------------|
| H | -3.11163359 | 0.35141729  | 2.11299035  |
| H | -2.95648316 | 1.79209579  | 1.12294827  |
| H | -1.21552182 | -1.93691298 | -2.16247064 |
| H | -1.07249171 | -3.42607502 | -1.23727954 |
| H | -1.26838768 | 2.81656198  | -0.58153228 |
| H | -1.13813172 | 2.77209770  | -2.33481670 |
| H | -1.22799087 | -0.92342021 | 2.73933618  |
| H | -1.11400193 | 0.62190321  | 3.57277774  |

**Table S15.** Computed coordinates of [Co(dinosar)]Cl<sub>3</sub> (**6**) with fixed Co–N<sub>6</sub> bond distances from previous 57 °C EXAFS data (1.9776(6) Å). Total energy: -2672.10799293 Hartrees

| Symbol | x           | y           | z           |
|--------|-------------|-------------|-------------|
| Co     | -0.00001838 | 0.00000776  | -0.00312521 |
| N      | 4.58288555  | -0.00331392 | 0.00594435  |
| O      | 5.15406833  | 1.05055231  | 0.11366243  |
| O      | 5.06419398  | -1.10664168 | -0.07729689 |
| C      | 3.04383231  | 0.03613041  | -0.00692978 |
| C      | 2.61957848  | -0.64336284 | -1.30593766 |
| C      | 2.60745161  | 1.49416036  | 0.05961782  |
| C      | 2.62268804  | -0.75896305 | 1.22815269  |
| N      | 1.13790406  | -0.86234714 | -1.37147456 |
| N      | 1.11646168  | 1.63068351  | -0.07573622 |
| N      | 1.13827720  | -0.73607695 | 1.43679351  |
| C      | 0.77520038  | -2.31111593 | -1.41552823 |
| C      | 0.72550021  | 2.39409203  | -1.29905635 |
| C      | 0.75111186  | -0.06026516 | 2.71174534  |
| H      | 0.86318016  | -0.49563355 | -2.27926306 |
| H      | 0.84428040  | 2.22646413  | 0.70207707  |
| H      | 0.88289926  | -1.71172194 | 1.56820770  |
| N      | -4.58289886 | 0.00341114  | 0.00593909  |
| O      | -5.15407668 | -1.05052886 | 0.11288972  |
| O      | -5.06414609 | 1.10681847  | -0.07650532 |
| C      | -3.04386031 | -0.03605605 | -0.00695980 |
| C      | -2.60753431 | -1.49413878 | 0.05868101  |
| C      | -2.61962982 | 0.64419598  | -1.30557160 |
| C      | -2.62269317 | 0.75833118  | 1.22857381  |
| N      | -1.11651126 | -1.63062741 | -0.07644661 |
| N      | -1.13792386 | 0.86296786  | -1.37110707 |
| N      | -1.13828492 | 0.73532148  | 1.43721033  |

|   |             |             |             |
|---|-------------|-------------|-------------|
| C | -0.72534746 | -2.39368070 | -1.29992163 |
| C | -0.77504427 | 2.31170076  | -1.41478088 |
| C | -0.75113095 | 0.05877089  | 2.71177473  |
| H | -0.84449304 | -2.22660888 | 0.70126776  |
| H | -0.86329537 | 0.49642190  | -2.27899006 |
| H | -0.88289302 | 1.71088573  | 1.56920077  |
| H | 3.13308072  | -1.60144857 | -1.39130119 |
| H | 2.92541075  | -0.03387411 | -2.15822644 |
| H | 3.09545543  | 2.06549461  | -0.72969440 |
| H | 2.92275182  | 1.93803468  | 1.00371822  |
| H | 3.11251021  | -0.34882001 | 2.11353614  |
| H | 2.95895309  | -1.79079113 | 1.12508690  |
| H | 1.26794634  | -2.81698353 | -0.58168449 |
| H | 1.13881397  | -2.77364955 | -2.33507673 |
| H | 1.21505773  | 1.93730196  | -2.16273541 |
| H | 1.07307525  | 3.42717518  | -1.23851548 |
| H | 1.22721987  | 0.92289793  | 2.74043814  |
| H | 1.11428471  | -0.62223964 | 3.57436861  |
| H | -3.09538774 | -2.06489746 | -0.73114050 |
| H | -2.92306484 | -1.93866817 | 1.00239653  |
| H | -3.13297595 | 1.60242379  | -1.39026430 |
| H | -2.92565354 | 0.03531197  | -2.15822566 |
| H | -3.11252240 | 0.34770797  | 2.11373132  |
| H | -2.95894588 | 1.79021942  | 1.12607005  |
| H | -1.21486828 | -1.93668319 | -2.16351652 |
| H | -1.07284311 | -3.42680919 | -1.23970482 |
| H | -1.26776388 | 2.81738185  | -0.58080478 |
| H | -1.13857850 | 2.77452152  | -2.33421533 |
| H | -1.22725231 | -0.92440271 | 2.73990617  |
| H | -1.11430463 | 0.62025296  | 3.57471845  |

## References

1. Krause, R.; Megargel, E. Student synthesis of tris(ethylenediamine)cobalt(III) chloride | Journal of Chemical Education. *J. Chem. Educ.* **1976**, *53*, 667, doi:10.1021/ed053p667.
2. Bailar, J.C.; Work, J.B. Some Coördination Compounds of Cobalt Containing Trimethylenediamine and Neopentanediamine. *J. Am. Chem. Soc.* **1946**, *68*, 232–235, doi:10.1021/ja01206a024.
3. Geue, R.J.; Snow, M.R. Structure, conformational analysis and optical activity of a bis(tridentate)cobalt(III) complex. (+)589- $\Delta\Delta\Delta$ -Bis[1,1,1-tris(aminomethyl)ethane]cobalt(III) chloride (+)589-(R,R)-tartrate hydrate. *Inorg. Chem.* **1977**, *16*, 231–241, doi:10.1021/ic50168a004.
4. Qin, C.-J.; James, L.; Chartres, J.D.; Alcock, L.J.; Davis, K.J.; Willis, A.C.; Sargeson, A.M.; Bernhardt, P.V.; Ralph, S.F. An Unusually Flexible Expanded Hexamine Cage and Its CuII Complexes: Variable Coordination Modes and Incomplete Encapsulation. *Inorg. Chem.* **2011**, *50*, 9131–9140, doi:10.1021/ic201326d.
5. Bottomley, G.; Clark, I.; Creaser, I.; Engelhardt, L.; Geue, R.; Hagen, K.; Harrowfield, J.; Lawrance, G.; Lay, P.; Sargeson, A.; et al. The Synthesis and Structure of Encapsulating Ligands: Properties of Bicyclic Hexamines. *Aust. J. Chem.* **1994**, *47*, 143, doi:10.1071/CH9940143.
6. Ozvat, T.M.; Peña, M.E.; Zadrozny, J.M. Influence of ligand encapsulation on cobalt-59 chemical-shift thermometry. *Chem. Sci.* **2019**, *10*, 6727–6734, doi:10.1039/C9SC01689A.
7. The MathWorks Inc. *Signal Processing Toolbox References*; Natick, MA, 2020;
8. Frisch, M.J.; Trucks, G.W.; Schlegel, H.B.; Scuseria, G.E.; Robb, M.A.; Cheeseman, J.R.; Scalmani, G.; Barone, V.; Petersson, G.A.; Nakatsuji, H.; et al. *Gaussian 16 Rev. C.01*; Wallingford, CT, 2016;
9. Neese, F. A spectroscopy oriented configuration interaction procedure. *The Journal of Chemical Physics* **2003**, *119*, 9428–9443, doi:10.1063/1.1615956.
10. Grimme, S.; Antony, J.; Ehrlich, S.; Krieg, H. A consistent and accurate ab initio parametrization of density functional dispersion correction (DFT-D) for the 94 elements H-Pu. *J. Chem. Phys.* **2010**, *132*, 154104, doi:10.1063/1.3382344.
11. Krishnan, R.; Binkley, J.S.; Seeger, R.; Pople, J.A. Self-consistent molecular orbital methods. XX. A basis set for correlated wave functions. *The Journal of Chemical Physics* **1980**, *72*, 650–654, doi:10.1063/1.438955.
12. Neese, F. The ORCA program system. *WIREs Computational Molecular Science* **2012**, *2*, 73–78, doi:10.1002/wcms.81.
13. Sudmeier, J.L.; Anderson, S.E.; Frye, J.S. Calculation of Nuclear Spin Relaxation Times. *Concepts in Magnetic Resonance* **1990**, *2*, 197–212, doi:10.1002/cmr.1820020403.
14. Farrar, T.; Becker, E. *Pulse Fourier Transform NMR*; Academic Press: New York, 1971;
15. The MathWorks Inc. *Curve Fitting Toolbox User's Guide R*; Natick, MA, 2020;

16. The MathWorks Inc. *Symbolic Math Toolbox*; Natick, MA, 2020;
17. Ozvat, T.M.; Sterbinsky, G.E.; Campanella, A.J.; Rappé, A.K.; Zadrozny, J.M. EXAFS investigations of temperature-dependent structure in cobalt-59 molecular NMR thermometers. *Dalton Trans.* **2020**, doi:10.1039/D0DT01391A.
